# Supplementary material
Source: PubMed Central journal article supplement (PMC4815601)

**Supplementary Figure 1.** Box plots showing mean pairwise geographic distances between 100 demes randomly placed in habitat of five neutral landscapes (Fig. 2). Each box plot shows the range of mean distances from 50 random deme topologies.

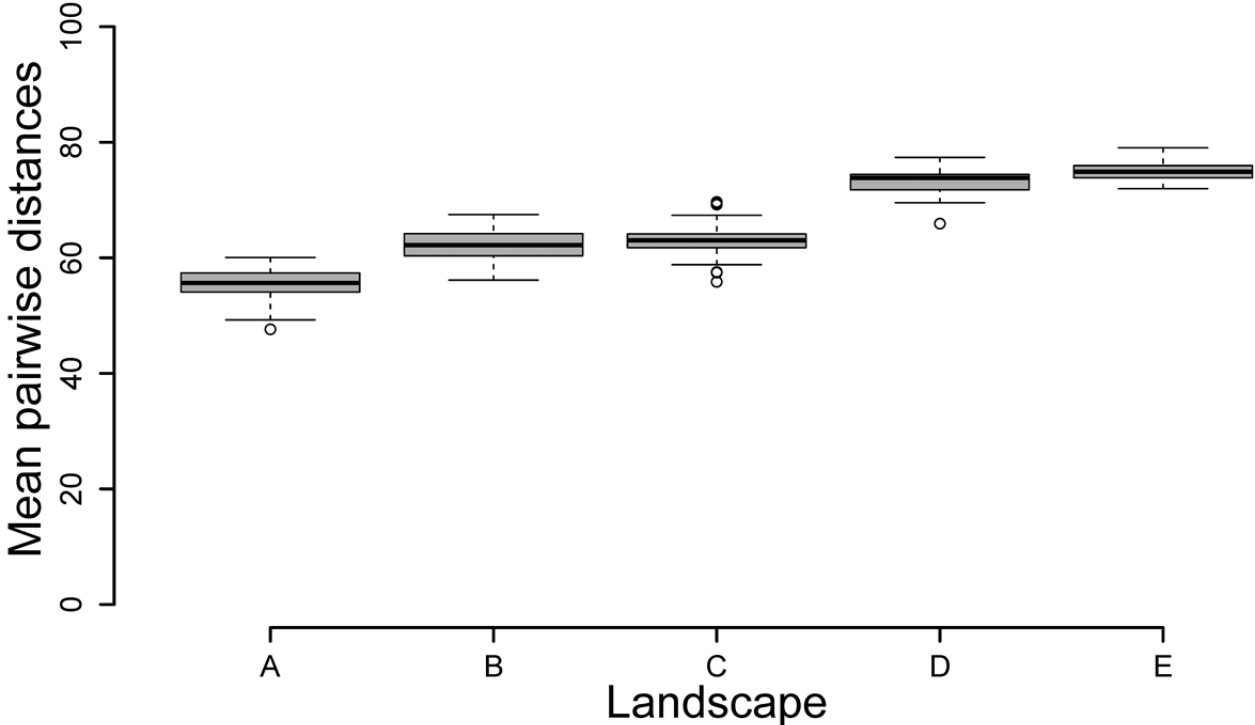

Supplement: hdy201462x1.pdf [file hdy201462x1.pdf]
