# Supplementary material
Source: PubMed Central journal article supplement (PMC4815601)

**Supplementary Figure 2.** Beanplots (Kampstra P, 2008, Beanplot: a boxplot alternative for visual comparison of distributions. Journal of Statistical Software Code Snippets 28: 1-9) indicating the distance at which a correlation between pairwise  $F_{ST}$  and distance is maximized (distance of maximum correlation; DMC) of 50 random topologies of 100 demes in habitat of five neutral landscapes (Fig. 2) at generations 50 (A, C, E, G) and 500 (B, D, F, H). Exponential migration probability functions were used in these simulations. We tested a range of maximum migration distances increasing from top to bottom (A,B: 17.0; C, D: 24.3; E, F: 31.2; G, H: 38.0).

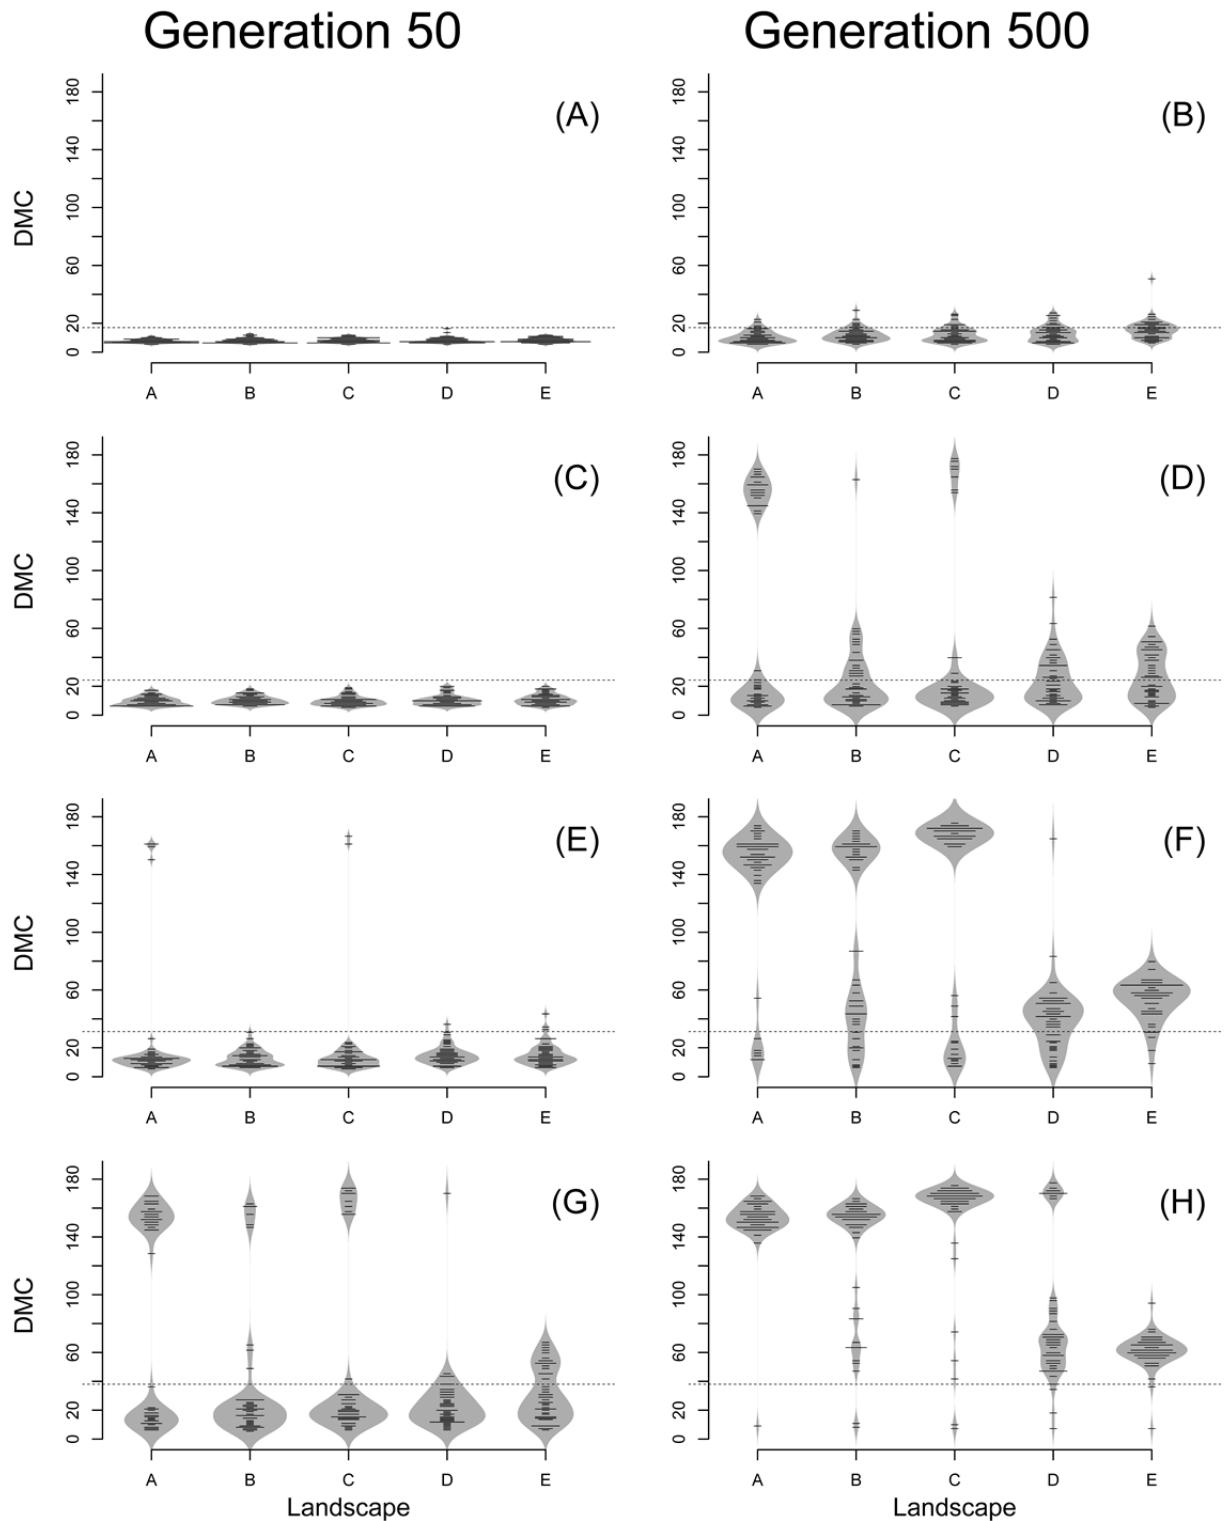

Supplement: hdy201462x2.pdf [file hdy201462x2.pdf]
